# Supplementary material for: Overexpression of cry1c* Enhances Resistance against to Soybean Pod Borer (Leguminivora glycinivorella) in Soybean
Source: MDPI journal article supplement (doi:10.3390/plants13050630), 2024-02-25
Supplement: s1 [file s1]

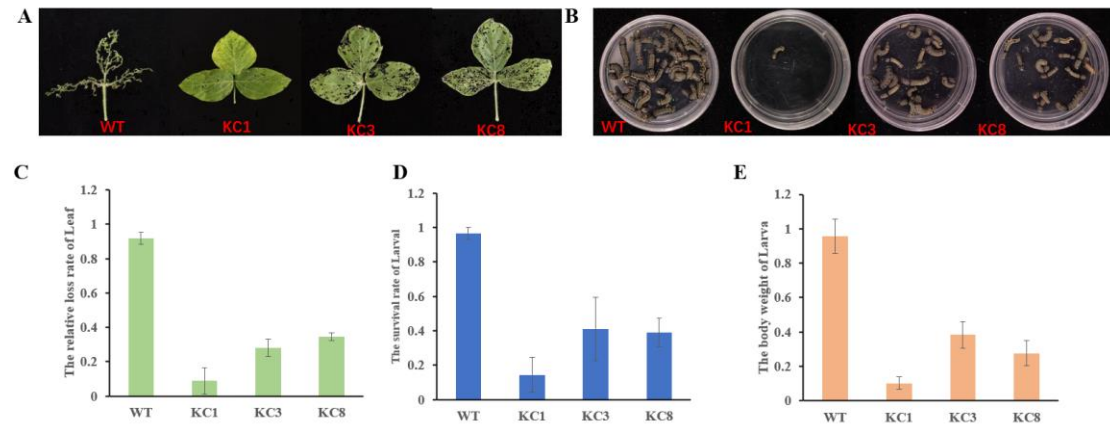

**Figure S1. In planta feeding bioassays of *S. litura*.** (A) The phenotype of feeding situation by *S. litura* larvae; (B) Survived larvae of *S. litura* after 15 days feeding; (C) The relative loss rate of leaf that fed by *S. litura* larvae; (D) The survival rate of *S. litura* larvaess; (E) The body weight of *S. litura* larvae.

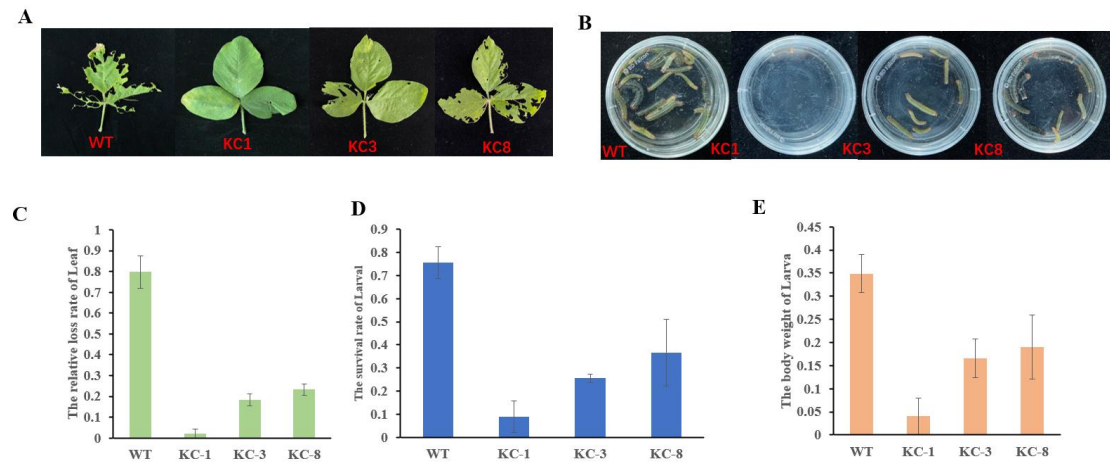

**Figure S2. In planta feeding bioassays of *M.separta*.** (A) The phenotype of feeding situation by *M.separta* larvae; (B) Survived larvae of *M.separta* after 15 days feeding; (C) The relative loss rate of leaf that fed by *M.separta* larvae; (D) The survival rate of *M.separta* larvae; (E) The body weight of *M.separta* larvae.

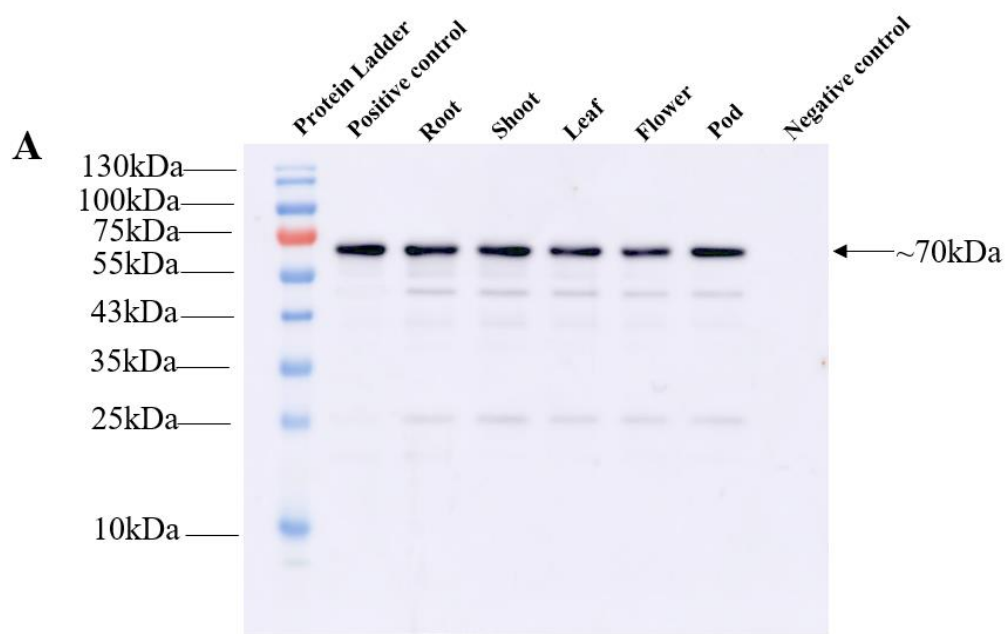

**Figure S3. Western blot analyses for detection Cry1C\* in the tissues of transgenic line KC1 are shown.** Positive control is Cry1C protein provide by Youlong Biotechnological Co., LTD. Negative control is leaf of KN18. Arrows indicate the band of the Cry1C\* protein.

**Table S1.** The list of primers used in this study.

| Name of Lines | Sequences                     |
|---------------|-------------------------------|
| Cry1C -F1     | TTCTACTGGGGAGGACATCG          |
| Cry1C -R1     | CGGTATCTTTGGGTGATTGG          |
| Bar-F1        | GCGGTACCGGCAGGCTGAAG          |
| Bar-R1        | CCGCAGGAACCGCAGGAGTG          |
| Act-F         | TTGACTGAGCGTG GTTATTCC        |
| Act-R         | GATCTTCATGCT GCTGGGTG         |
| Cry1C FA-F1   | TCTCTCTCACTTGTT CAGTTCTTGGT-3 |
| Cry1C FA-R1   | TGCTGGGTTG TTAGGATCTTCTT-3    |
| KC1GL-F1      | TTTTTTTTACCAGAACACCC          |
| BarR1         | GGTCAACTCCGTACCGAGC           |
